# Supplementary material for: Bilayered photoanode consisting of zinc oxide hollow spheres and urchin-like titanium dioxide microspheres enables fast electron transport and efficient light-harvesting for improved-performance dye-sensitized solar cells
Source: Royal Society of Chemistry journal article supplement (doi:10.1039/c5ra25225c), 2016-01-01
Supplement: c5ra25225c1.pdf [file c5ra25225c1.pdf]

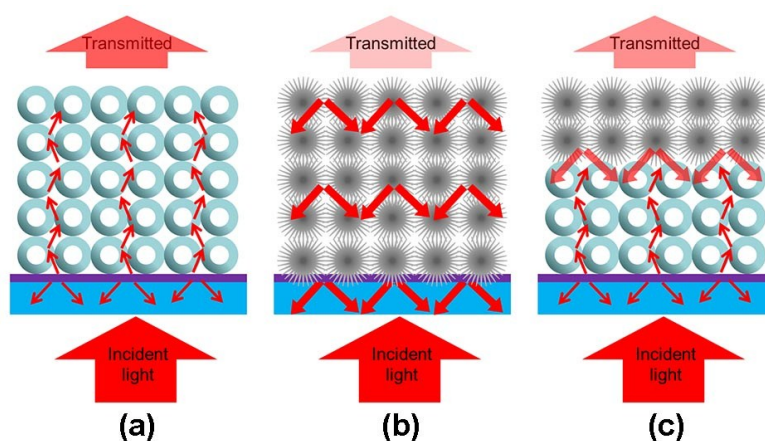

Fig. S1. Schematic model of light scattering for the (a) ZHS, (b) UTS-2 and (c) ZHS+UTS-2 film.

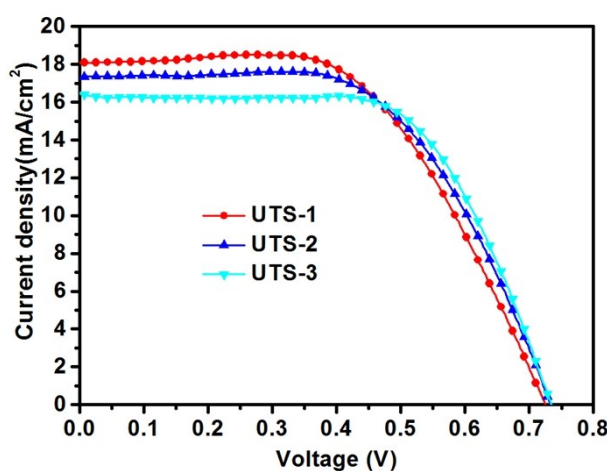

Fig. S2. I-V curves for DSSCs with three kinds of UTSS based photoanodes.

| DSSCs | $J_{sc}$ (mA cm <sup>-2</sup> ) | $V_{oc}$ (V) | FF (%) | $\eta$ (%) |
|-------|---------------------------------|--------------|--------|------------|
| UTS-1 | 17.96                           | 0.73         | 59     | 7.73       |
| UTS-2 | 17.34                           | 0.73         | 69     | 8.28       |
| UTS-3 | 16.50                           | 0.73         | 65     | 7.92       |

Table S1. The photovoltaic properties of the three different DSSCs derived from the above I-V curves.

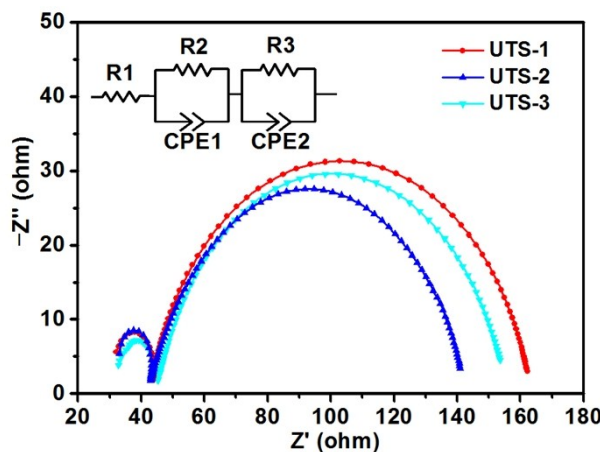

Fig. S3. Nyquist plots of UTS-1, UTS-2 and UTS-3 based DSSCs.

| DSSCs | $R_1(\Omega)$ | $R_2(\Omega)$ | $R_3(\Omega)$ |
|-------|---------------|---------------|---------------|
| UTS-1 | 30.8          | 11.8          | 127.7         |
| UTS-2 | 30.7          | 11.4          | 103.8         |
| UTS-3 | 30.1          | 10.4          | 119.3         |

Table S2. Simulative value of resistance ( $R_1$ ,  $R_2$  and  $R_3$ ) from EIS spectra calculated by equivalent circuit as shown in Fig. S3.

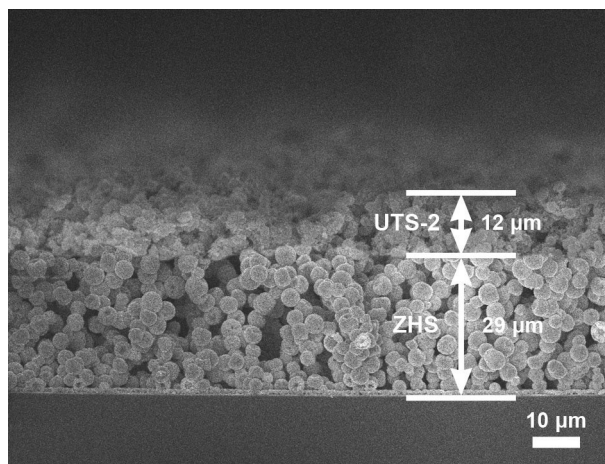

Fig. S4. SEM cross-sectional image of the bi-layer ZHS+UTS-2 photoanode (before dye-loading).
